# Supplementary material for: Pseudoscience in the Times of Crisis: How and Why Chlorine Dioxide Consumption Became Popular in Latin America During the COVID-19 Pandemic
Source: Frontiers journal article supplement (doi:10.3389/fpos.2021.621370), 2021-04-12
Supplement: Table_1.XLSX [file Table_1.XLSX]

## Sheet: Sheet1
Table 1. Latin American countries and their positions in international rankings. A list of all Latin American countries ranked by their position in the Global Innovation Index, as well as the Gini Index and the Freedom in the World Index. Additionally, information on whether COMUSAV has an active chapter in these countries, as well as whether there were discussions on approving chlorine dioxide i…
Country	Global Innovation Index	Global Innovation Rank	COMUSAV Chapter	Proposed and Discussed in Congress	Income	Gini Index	Freedom in the World Index	Chlorine Dioxide Consumption
Chile	33.86	54	Yes	Proposed but no discussed	High Income	44.4	90	Low
Mexico	33.6	55	Yes	No	Upper-Middle Income	45.4	62	Medium
Costa Rica	33.51	56	Yes	No	Upper-Middle Income	48	91	Low
Brazil	31.94	62	Yes	No	Upper-Middle Income	53.9	75	Low
Colombia	30.84	68	Yes	No	Upper-Middle Income	50.4	66	Low
Uruguay	30.84	69	Yes	No	High Income	39.7	98	Low
Panama	29.04	73	Yes	No	High Income	49.2	84	Low
Peru	28.79	76	Yes	Discussed but not approved	Upper-Middle Income	42.8	72	High
Argentina	28.33	80	Yes	Proposed but no discussed	Upper-Middle Income	41.4	85	Medium
Dominican Republic	25.1	90	Yes	No	Upper-Middle Income	43.7	67	Medium
El Salvador	24.85	92	No	No	Lower-Middle Income	38.6	66	Medium
Paraguay	24.14	97	Yes	No	Upper-Middle Income	46.2	65	Low
Ecuador	24.11	99	Yes	Yes	Upper-Middle Income	45.4	65	High
Honduras	22.95	103	Yes	No	Lower-Middle Income	52.1	45	High
Bolivia	22.41	105	Yes	Discussed and approved	Lower-Middle Income	42.2	63	High
Guatemala	22.35	106	Yes	No	Upper-Middle Income	48.3	52	High
